# Supplementary material
Source: PubMed Central journal article supplement (PMC2493244)

Fig. A1

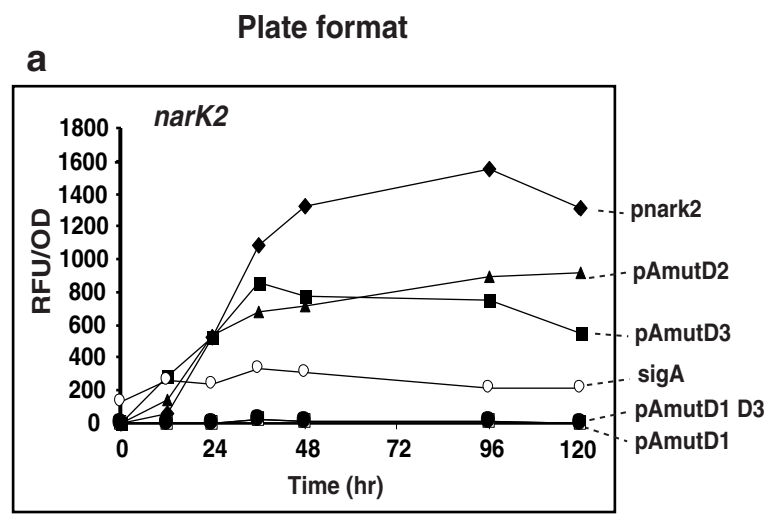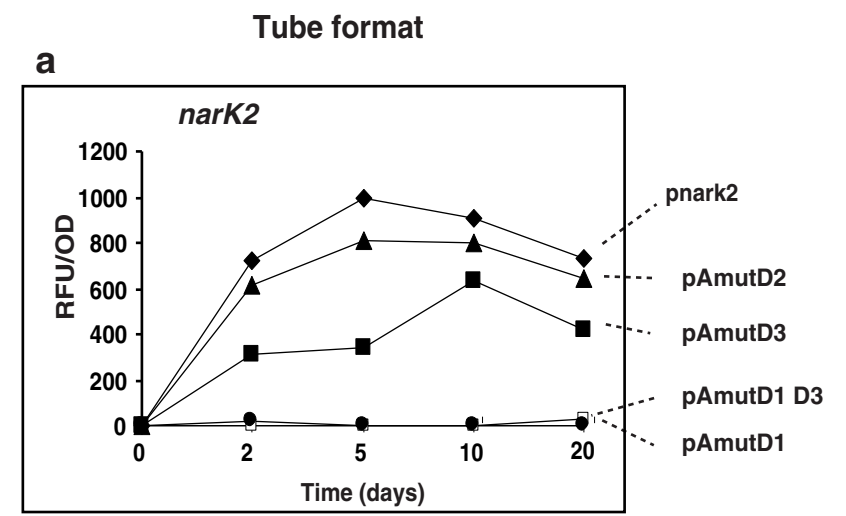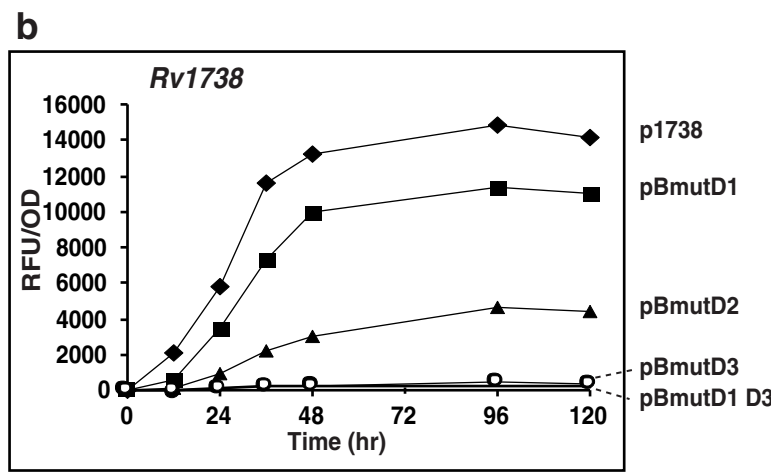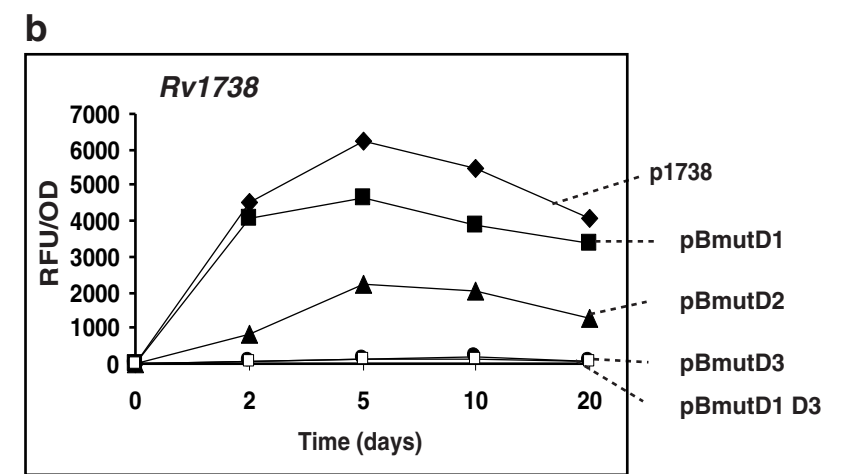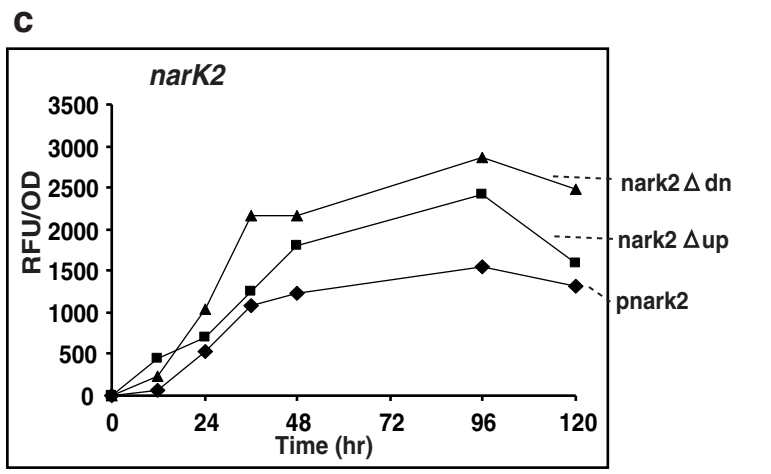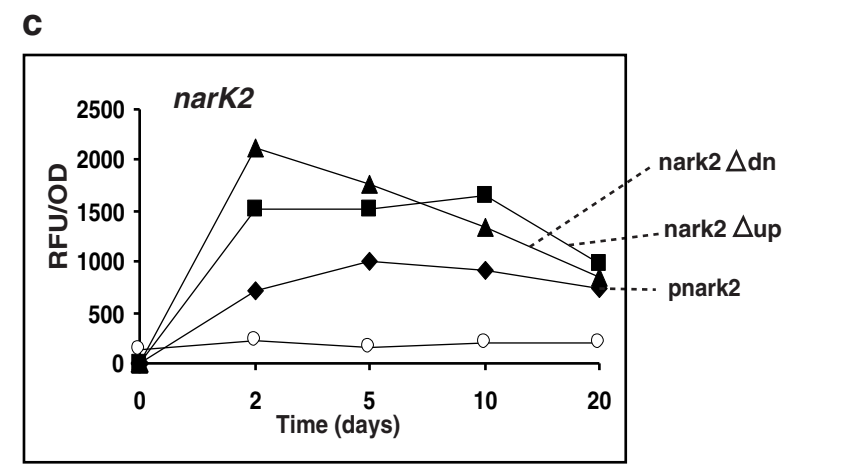

Supplement: supp_190_15_5394__1.pdf [file supp_190_15_5394__1.pdf]
